# Supplementary material for: Synthesis of TiO2–WO3 nanocomposites as highly sensitive benzene sensors and high efficiency adsorbents
Source: Royal Society of Chemistry journal article supplement (doi:10.1039/c2jm32478d), 2012-01-01
Supplement: c2jm32478d.pdf [file c2jm32478d.pdf]

**Supporting information available:**

**Synthesis of TiO<sub>2</sub>-WO<sub>3</sub> nanocomposites as a highly sensitive benzene sensor and a high efficiency absorbent**

**Ying Zhu,<sup>a</sup> Xintai Su,<sup>\*a</sup> Chao Yang,<sup>a</sup> Xiaoqing Gao,<sup>a</sup> Feng Xiao,<sup>a</sup> and Jide Wang<sup>a</sup>**

<sup>1</sup> *Ministry Key Laboratory of Oil and Gas Fine Chemicals, College of Chemistry and Chemical Engineering, Xinjiang University, 14 Shengli Rd., urumqi, China*

\*To whom correspondence should be addressed. Tel: +86 991 8581018; Fax: +86 991 8582807; E-mail: [suxintai827@163.com](mailto:suxintai827@163.com).

*1. Materials*

Unless otherwise stated, all reagents and chemicals were obtained commercially and used without further purification.

*2. Characterization*

X-ray diffraction (XRD) patterns of the products were recorded on a DX-1000 X-ray diffractometer equipped with graphite monochromatized Cu-K $\alpha$  radiation ( $\lambda = 1.54056 \text{ \AA}$ ). The microstructure of the TiO<sub>2</sub>-WO<sub>3</sub> nanocomposites was investigated by Transmission electron microscopy (TEM, Hitachi H-600, Japan) and scanning electron microscopy (SEM, LEO1430VP, Germany). UV-vis absorption spectra were recorded with a Shimadzu UV-2450. The BET and BJH results were measured on a nitrogen adsorption apparatus (JW-BK, China) at 77 K.

### 3. Gas sensing

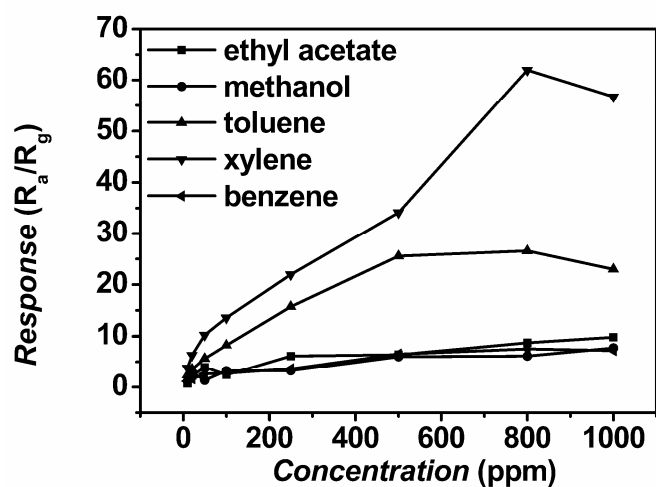

**Fig. S1** The correlation between the concentration and the response ( $R_a/R_g$ ) to three gases of the  $\text{TiO}_2\text{-WO}_3$  composites ( $n_{\text{Ti}}:n_{\text{W}}=4:1$ ) of methanol; ethyl acetate; benzene; toluene; xylene; at 340 °C; 400 °C; 400 °C; 440 °C; 420 °C, respectively.

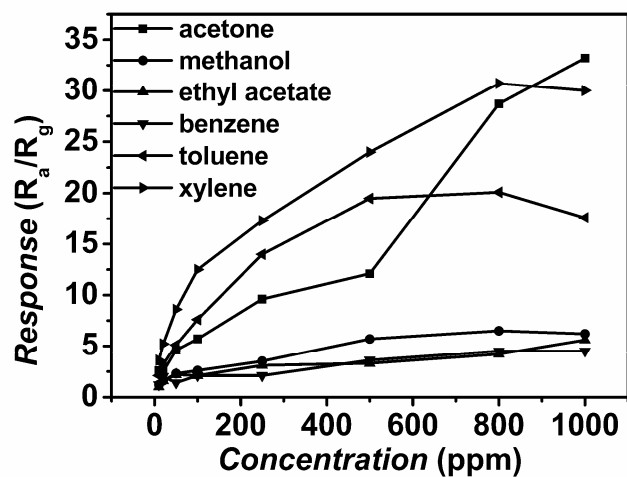

**Fig. S2** The correlation between the concentration and the response ( $R_a/R_g$ ) to three gases of the  $\text{TiO}_2\text{-WO}_3$  composites ( $n_{\text{Ti}}:n_{\text{W}}=2:1$ ) of acetone; methanol; ethyl acetate; benzene; toluene; xylene at 370 °C; 340 °C; 400 °C; 400 °C; 440 °C; 420 °C, respectively.

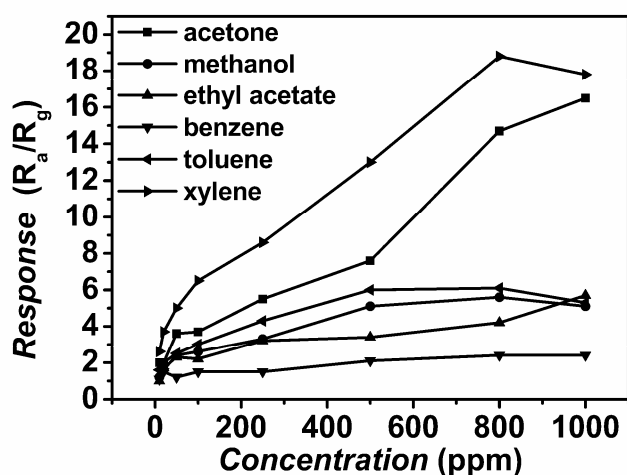

**Fig. S3** The correlation between the concentration and the response ( $R_a/R_g$ ) to three gases of the  $TiO_2-WO_3$  composites ( $n_{Ti}:n_W=1:1$ ) of acetone; methanol; ethyl acetate; benzene; toluene; xylene at 370 °C; 340 °C; 400 °C; 400 °C; 440 °C; 420 °C, respectively.

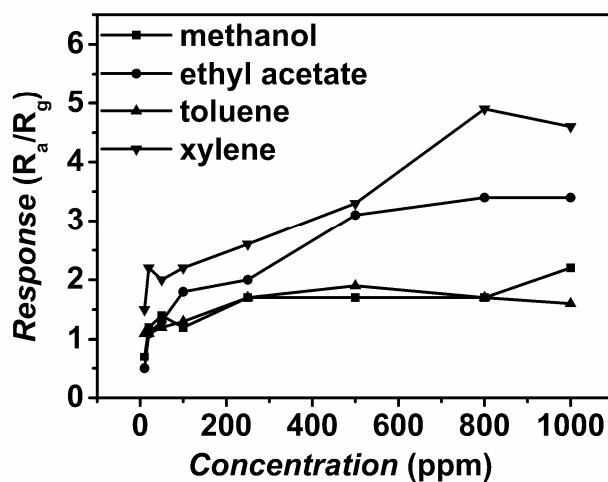

**Fig. S4** The correlation between the concentration and the response ( $R_a/R_g$ ) to three gases of the  $TiO_2-WO_3$  composites ( $n_{Ti}:n_W=1:2$ ) of methanol; ethyl acetate; toluene; xylene at 340 °C; 400 °C; 440 °C; 420 °C, respectively.

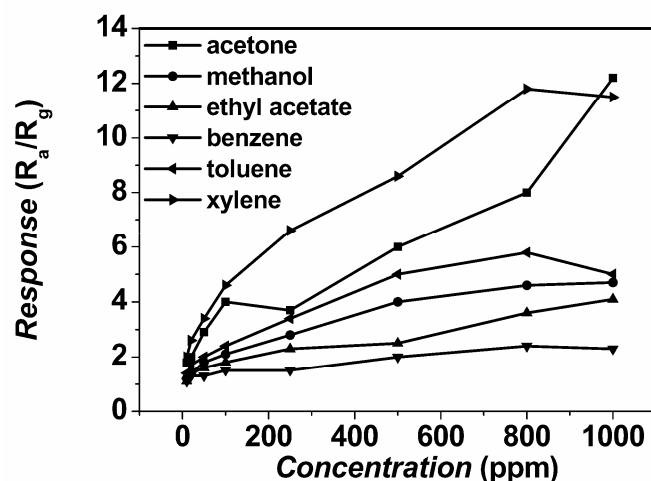

**Fig. S5** The correlation between the concentration and the response ( $R_a/R_g$ ) to three gases of the  $TiO_2-WO_3$  composites ( $n_{Ti}:n_W=1:4$ ) of ethanol; acetone; methanol; ethyl acetate; benzene; toluene; xylene at 340 °C; 370 °C; 420 °C; 400 °C; 400 °C; 440 °C; 420 °C, respectively.

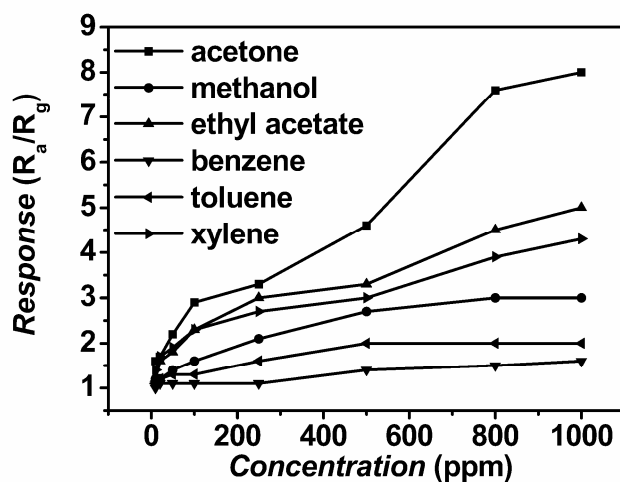

**Fig. S6** The correlation between the concentration and the response ( $R_a/R_g$ ) to three gases of the  $TiO_2-WO_3$  composites ( $n_{Ti}:n_W=0:1$ ) of ethanol; acetone; methanol; ethyl acetate; benzene; toluene; xylene at 340 °C; 370 °C; 420 °C; 400 °C; 400 °C; 440 °C; 420 °C respectively.

#### 4. Adsorption

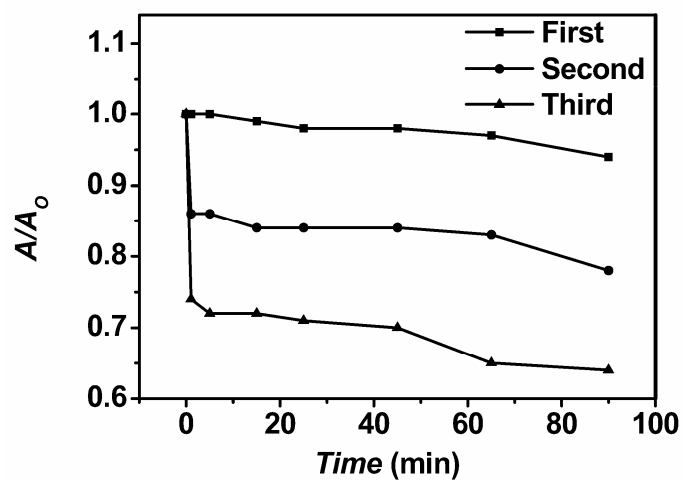

**Fig. S7** Adsorption rate of the methylene blue (MB) on (a) fresh  $\text{TiO}_2\text{-WO}_3$  composites ( $n_{\text{Ti}}:n_{\text{W}}=1:0$ ); (b) secondary; (c) third, respectively.

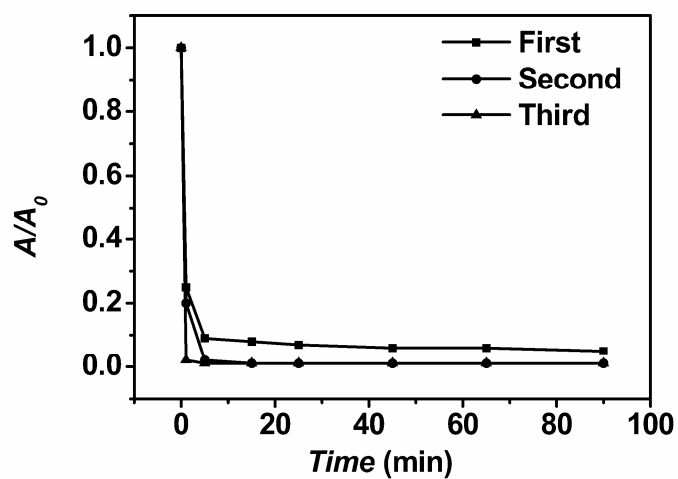

**Fig. S8** Adsorption rate of the MB on (a) fresh  $\text{TiO}_2\text{-WO}_3$  composites ( $n_{\text{Ti}}:n_{\text{W}}=4:1$ ); (b) secondary; (c) third, respectively.

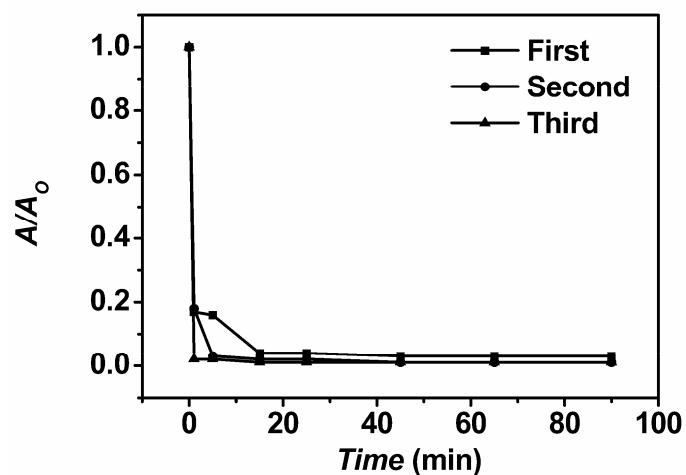

**Fig. S9** Adsorption rate of the MB on (a) fresh  $\text{TiO}_2\text{-WO}_3$  composites ( $n_{\text{Ti}}:n_{\text{W}}=2:1$ ); (b) secondary; (c) third, respectively.

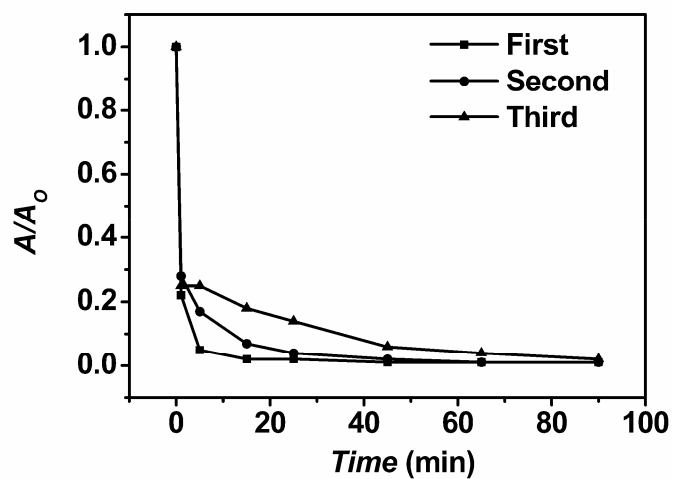

**Fig. S10** Adsorption rate of the MB on (a) fresh  $\text{TiO}_2\text{-WO}_3$  composites ( $n_{\text{Ti}}:n_{\text{W}}=1:1$ ); (b) secondary; (c) third, respectively.

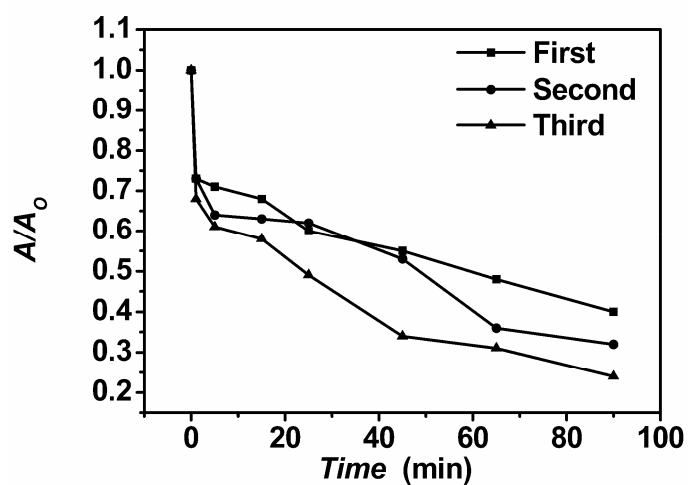

**Fig. S11** Adsorption rate of the MB on (a) fresh  $\text{TiO}_2\text{-WO}_3$  composites ( $n_{\text{Ti}}:n_{\text{W}}=1:2$ ); (b) secondary; (c) third, respectively.

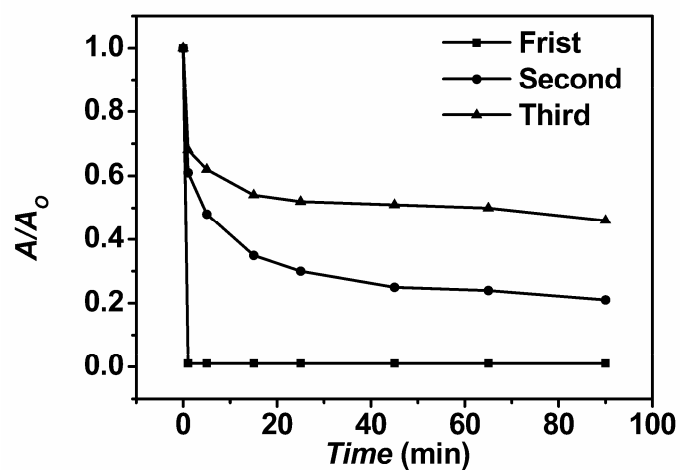

**Fig. S12** Adsorption rate of the MB on (a) fresh  $\text{TiO}_2\text{-WO}_3$  composites ( $n_{\text{Ti}}:n_{\text{W}}=1:4$ ); (b) secondary; (c) third, respectively.

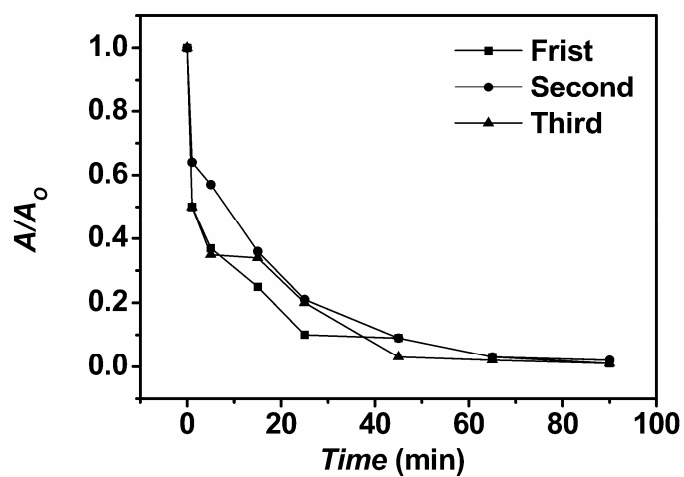

**Fig. S13** Adsorption rate of the MB on (a) fresh  $\text{TiO}_2\text{-WO}_3$  composites ( $n_{\text{Ti}}:n_{\text{W}}=0:1$ ); (b) secondary; (c) third, respectively.
